# Supplementary material
Source: Royal Society of Chemistry journal article supplement (doi:10.1039/d5nj04635a)
Supplement: d5nj04635a1.pdf [file d5nj04635a1.pdf]

**Phase variations in waste-derived CaSiO<sub>3</sub> for efficient drug loading, releasing, and antimicrobial applications**

**Sumaya Tabassum<sup>a</sup>, Mashrafi Bin Mobarak<sup>a</sup>, Md. Farid Ahmed<sup>a</sup>, Md. Najem Uddin<sup>b</sup>, Muhammad Shahriar Bashar<sup>c</sup>, Umme Sarmeen Akhtar<sup>a</sup>, Shirin Akter Jahan<sup>a</sup>, Samina Ahmed<sup>a\*</sup>, and Md. Sahadat Hossain<sup>a\*</sup>**

<sup>a</sup>Institute of Glass & Ceramic Research and Testing, Bangladesh Council of Scientific and Industrial Research (BCSIR), Dhaka-1205, Bangladesh

<sup>b</sup>BCSIR Laboratories Dhaka, Bangladesh Council of Scientific and Industrial Research (BCSIR), Dhaka-1205, Bangladesh

<sup>c</sup>Institute of Fuel Research & Development, Bangladesh Council of Scientific and Industrial Research (BCSIR), Dhaka 1205, Bangladesh

**Table S\_1:** Diameter and thickness of scaffolds.

| <b>Sample name</b> | <b>Diameter (mm)</b> | <b>Thickness (mm)</b> |
|--------------------|----------------------|-----------------------|
| 2:1_CS             | 13.19                | 2.14                  |
| 2:1.5_CS           | 13.14                | 1.81                  |
| 2:2_CS             | 13.12                | 1.79                  |
| 2:3_CS             | 13.29                | 1.78                  |

**Table S\_2:** Comparison of diffraction angles and planes of synthesized products with standard values.

| Sample name | Phase                                          | Phase percentage (%) | Diffraction angle (2 $\theta$ ) |          | Planes (h k l) |
|-------------|------------------------------------------------|----------------------|---------------------------------|----------|----------------|
|             |                                                |                      | Sample                          | Standard |                |
| 2:1         | Wollastonite (Monoclinic)<br>ICDD# 00-027-0088 | 98.6                 | 23.102                          | 23.149   | 4 0 0          |
|             |                                                |                      | 25.308                          | 25.303   | 0 0 2          |
|             |                                                |                      | 26.836                          | 26.848   | -2 0 2         |
|             |                                                |                      | 27.516                          | 27.472   | 4 0 1          |
|             |                                                |                      | 28.851                          | 28.870   | 2 0 2          |
|             |                                                |                      | 29.954                          | 29.991   | 3 2 0          |
|             |                                                |                      | 32.861                          | 32.852   | -4 0 2         |
|             |                                                |                      | 35.038                          | 35.022   | 6 0 0          |
|             |                                                |                      | 36.258                          | 36.266   | 1 2 2          |
|             |                                                |                      | 38.172                          | 38.217   | -5 0 2         |
|             |                                                |                      | 41.286                          | 41.304   | 5 2 1          |
|             |                                                |                      | 45.754                          | 45.722   | 6 0 2          |
|             |                                                |                      | 49.740                          | 49.785   | 0 4 0          |
|             |                                                |                      | 52.099                          | 52.212   | -2 0 4         |
|             |                                                |                      | 57.416                          | 57.450   | -2 4 2         |
|             | Di-calcium silicate<br>ICDD# 00-061-0379       | 1.4                  | 21.693                          | 21.700   | 2 0 0          |
|             |                                                |                      | 31.848                          | 31.760   | 1 1 3          |
|             |                                                |                      | 39.415                          | 39.380   | 1 0 4          |
|             |                                                |                      | 53.127                          | 53.220   | 3 1 4          |
| 2:1.5       | Wollastonite (Triclinic)<br>ICDD# 00-029-0372  | 68.5                 | 11.519                          | 11.513   | 1 0 0          |
|             |                                                |                      | 25.422                          | 25.354   | -2 0 1         |
|             |                                                |                      | 28.974                          | 28.897   | -1 0 2         |
|             |                                                |                      | 30.042                          | 30.001   | 2 -2 0         |
|             |                                                |                      | 35.178                          | 35.121   | 0 -2 2         |
|             |                                                |                      | 38.327                          | 38.336   | -1 -2 2        |
|             |                                                |                      | 39.290                          | 39.222   | -1 0 3         |
|             |                                                |                      | 41.337                          | 41.403   | -3 1 2         |
|             | Larnite<br>ICDD# 00-009-0351                   | 31.5                 | 49.837                          | 49.902   | 3 1 2          |
|             |                                                |                      | 50.910                          | 50.976   | 2 -2 3         |
|             |                                                |                      | 57.473                          | 57.636   | 4 -2 2         |
|             |                                                |                      | 23.199                          | 23.223   | 0 1 2          |
|             |                                                |                      | 26.355                          | 26.370   | 0 2 0          |
|             |                                                |                      | 28.082                          | 28.081   | 0 2 1          |

|        |                                                 |      |        |        |        |
|--------|-------------------------------------------------|------|--------|--------|--------|
| 2:2    | Larnite<br>ICDD# 00-009-0351                    | 97.3 | 29.293 | 29.296 | 1 1 2  |
|        |                                                 |      | 32.077 | 31.995 | -1 0 3 |
|        |                                                 |      | 32.607 | 32.606 | 2 0 0  |
|        |                                                 |      | 35.269 | 35.264 | 2 1 0  |
|        |                                                 |      | 37.430 | 37.441 | 1 2 2  |
|        |                                                 |      | 39.451 | 39.455 | 0 2 3  |
|        |                                                 |      | 41.181 | 41.370 | 3 3 -2 |
|        |                                                 |      | 56.439 | 56.300 | 3 4 1  |
|        | Rankinite<br>ICDD# 04-015-0709                  | 2.7  | 29.293 | 29.507 | 3 1 -2 |
|        |                                                 |      | 41.227 | 41.370 | 3 3 -2 |
| 56.530 |                                                 |      | 56.680 | 1 5 -2 |        |
| 2:3    | Larnite<br>ICDD# 00-009-0351                    | 81.1 | 29.311 | 29.296 | 1 1 2  |
|        |                                                 |      | 32.165 | 32.172 | -1 2 1 |
|        |                                                 |      | 32.578 | 32.606 | 2 0 0  |
|        |                                                 |      | 35.316 | 35.264 | 2 1 0  |
|        |                                                 |      | 37.350 | 37.441 | 1 2 2  |
|        |                                                 |      | 39.443 | 39.455 | 0 2 3  |
|        |                                                 |      | 41.235 | 41.225 | 0 3 1  |
|        |                                                 |      | 45.775 | 45.715 | -2 2 2 |
|        |                                                 |      | 47.881 | 47.914 | 2 1 3  |
|        |                                                 |      | 62.421 | 62.491 | 3 1 3  |
|        | Calcium silicate hydroxide<br>ICDD# 00-029-0377 | 18.9 | 44.494 | 44.186 | 2 1 2  |
|        |                                                 |      | 50.873 | 51.657 | -5 0 3 |
|        |                                                 |      |        |        |        |

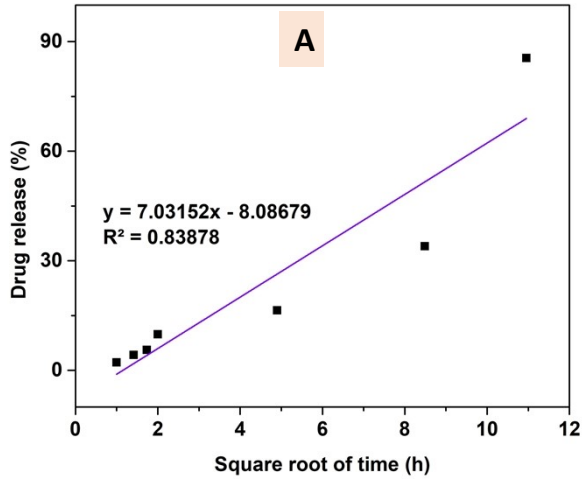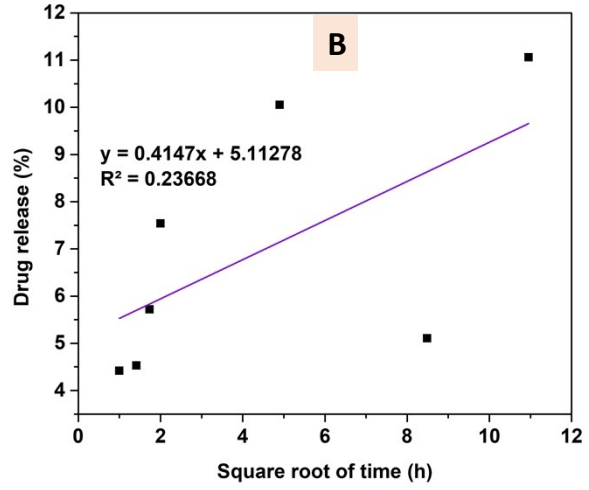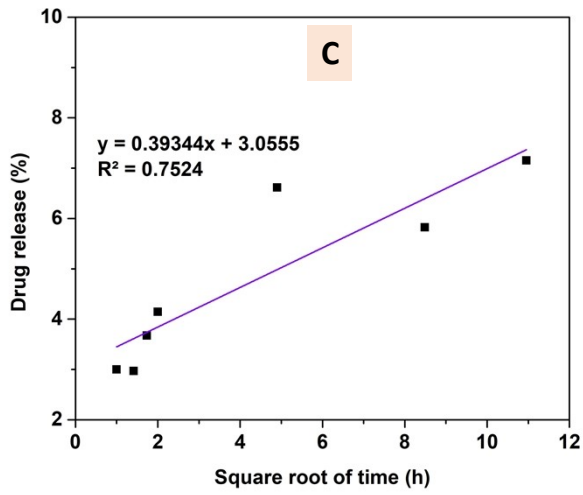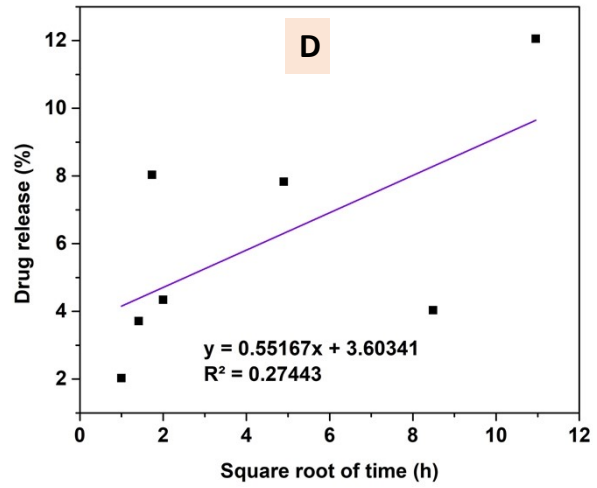

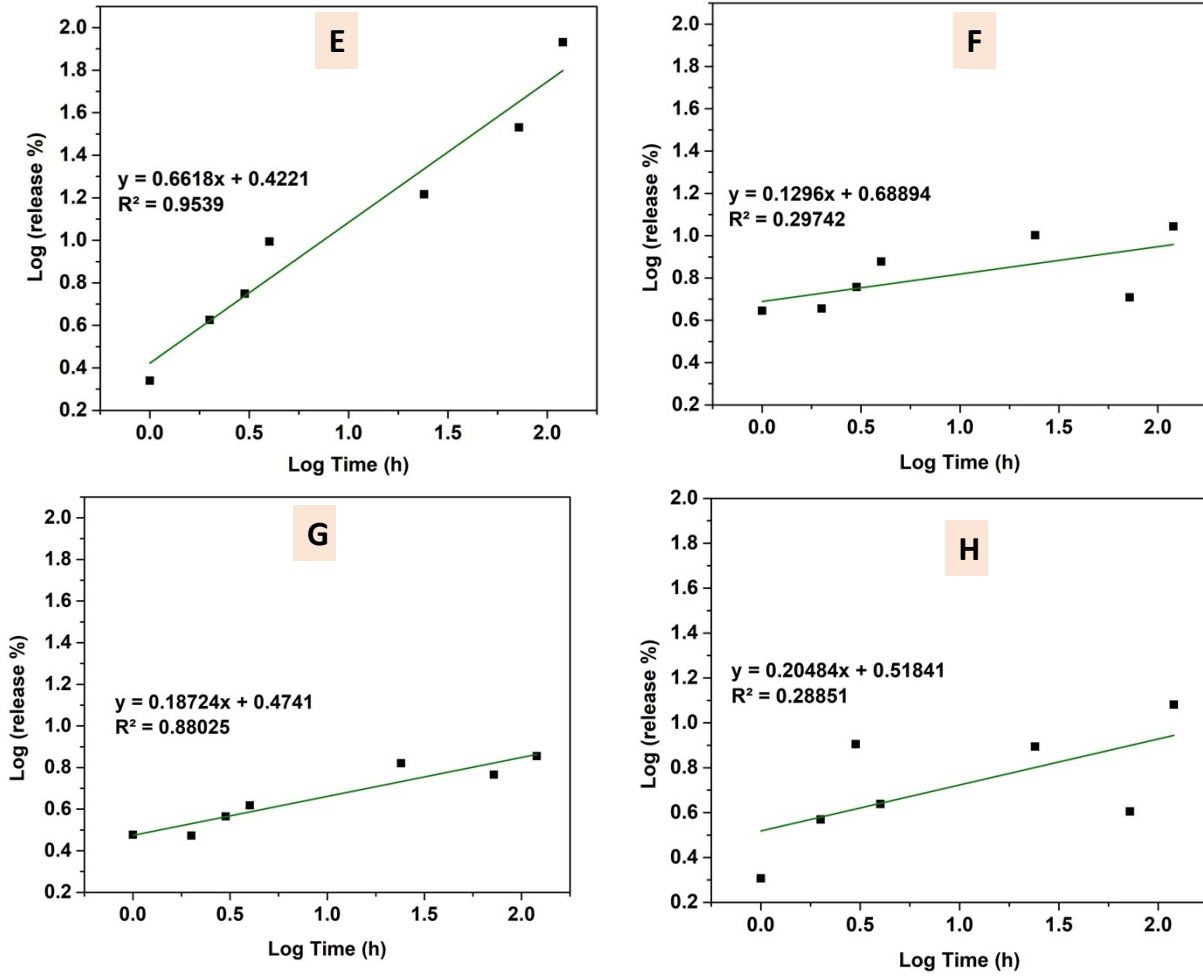

**Figure S\_1.** Higuchi release (A, B, C, D) and Korsmeyer-Peppas (E, F, G, H) model of CIP-loaded sample.

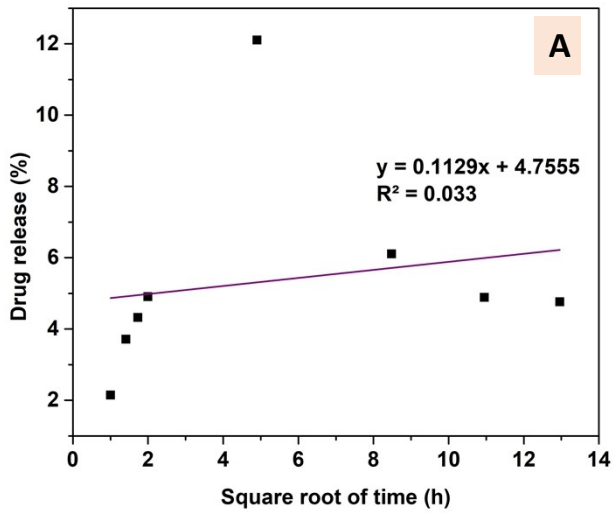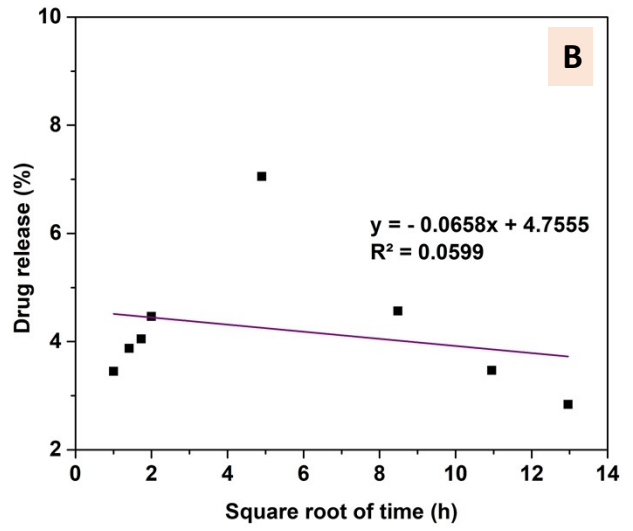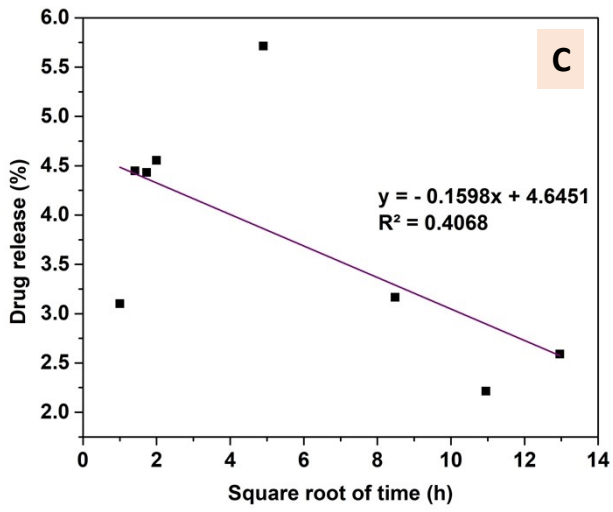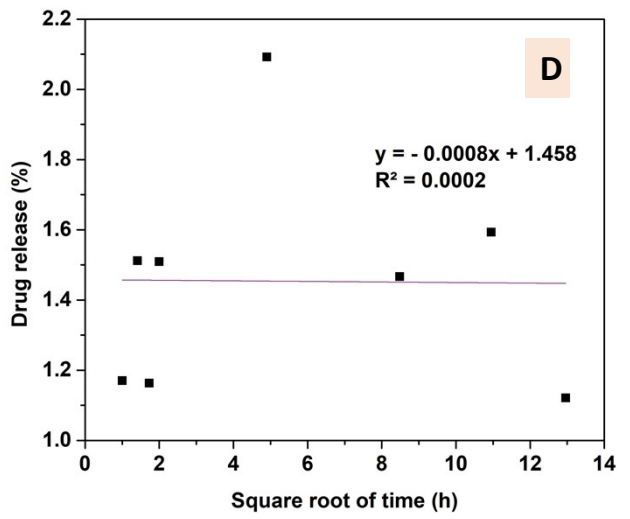

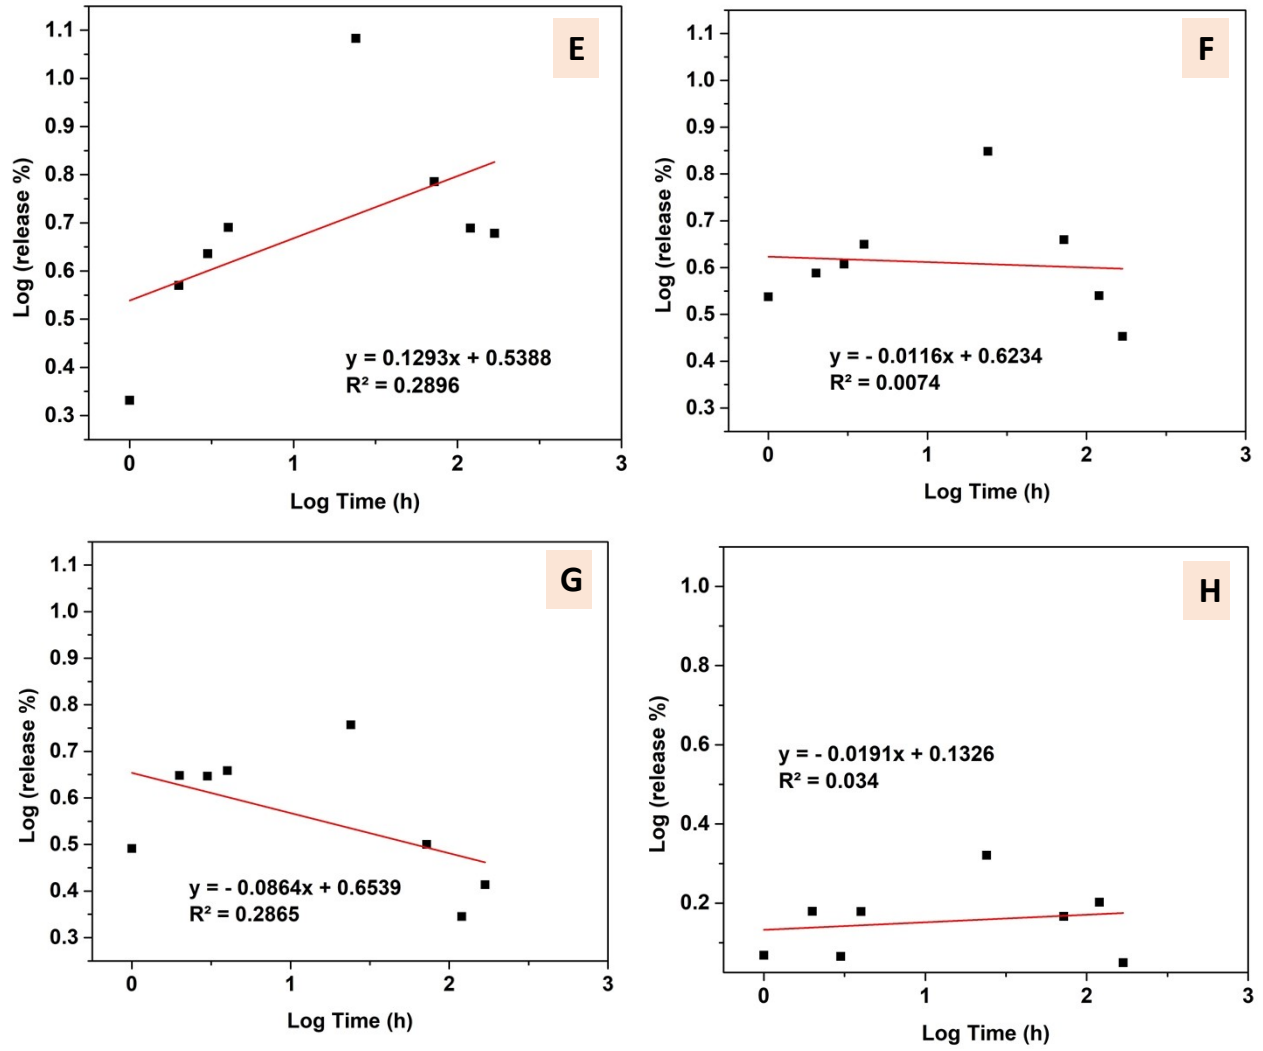

**Figure S\_2.** Higuchi release (A, B, C, D) and Korsmeyer-Peppas (E, F, G, H) model of AMX-loaded sample.

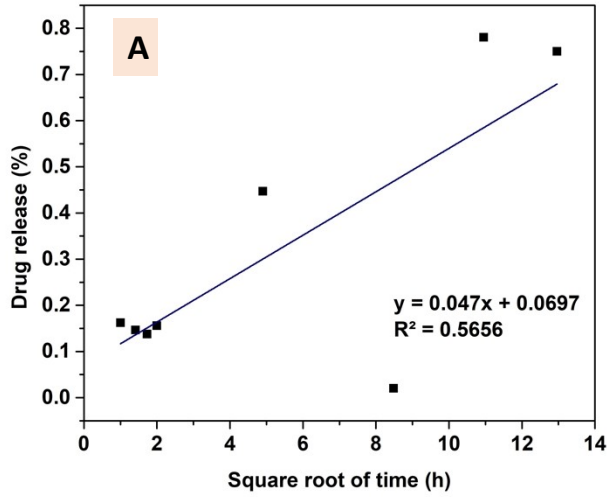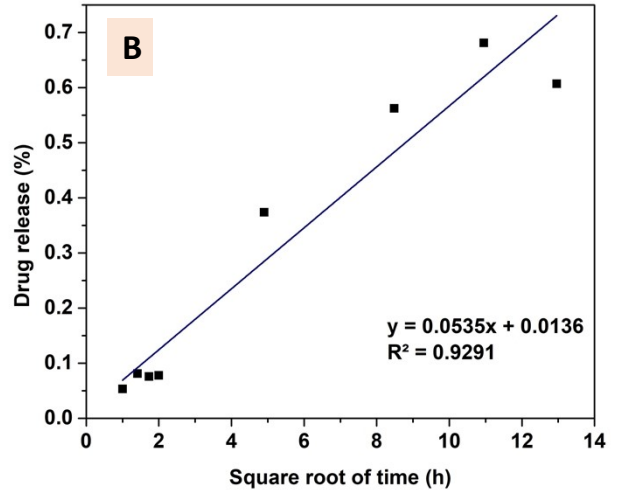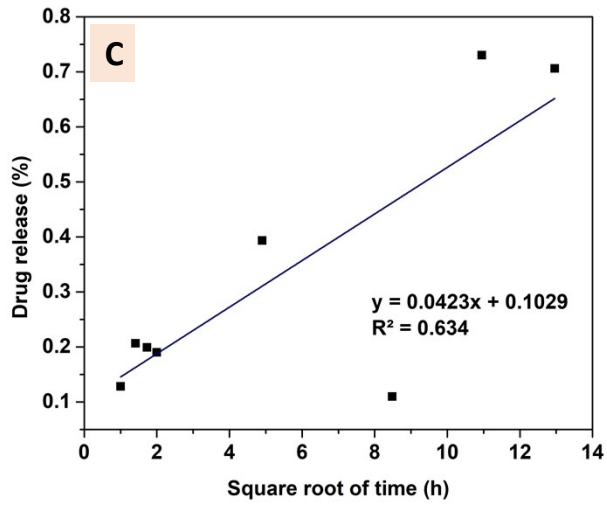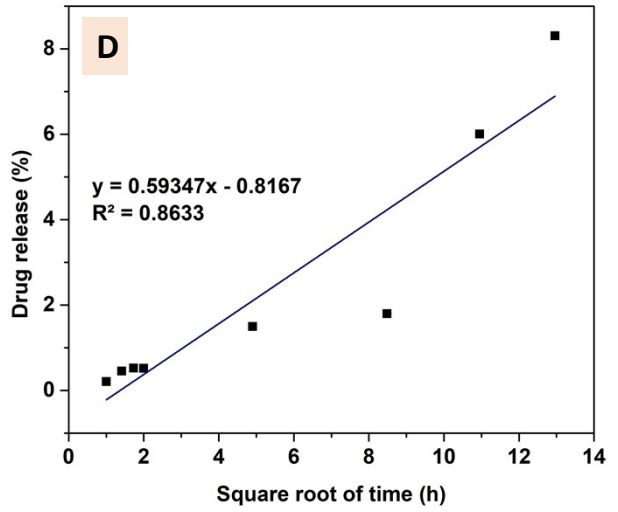

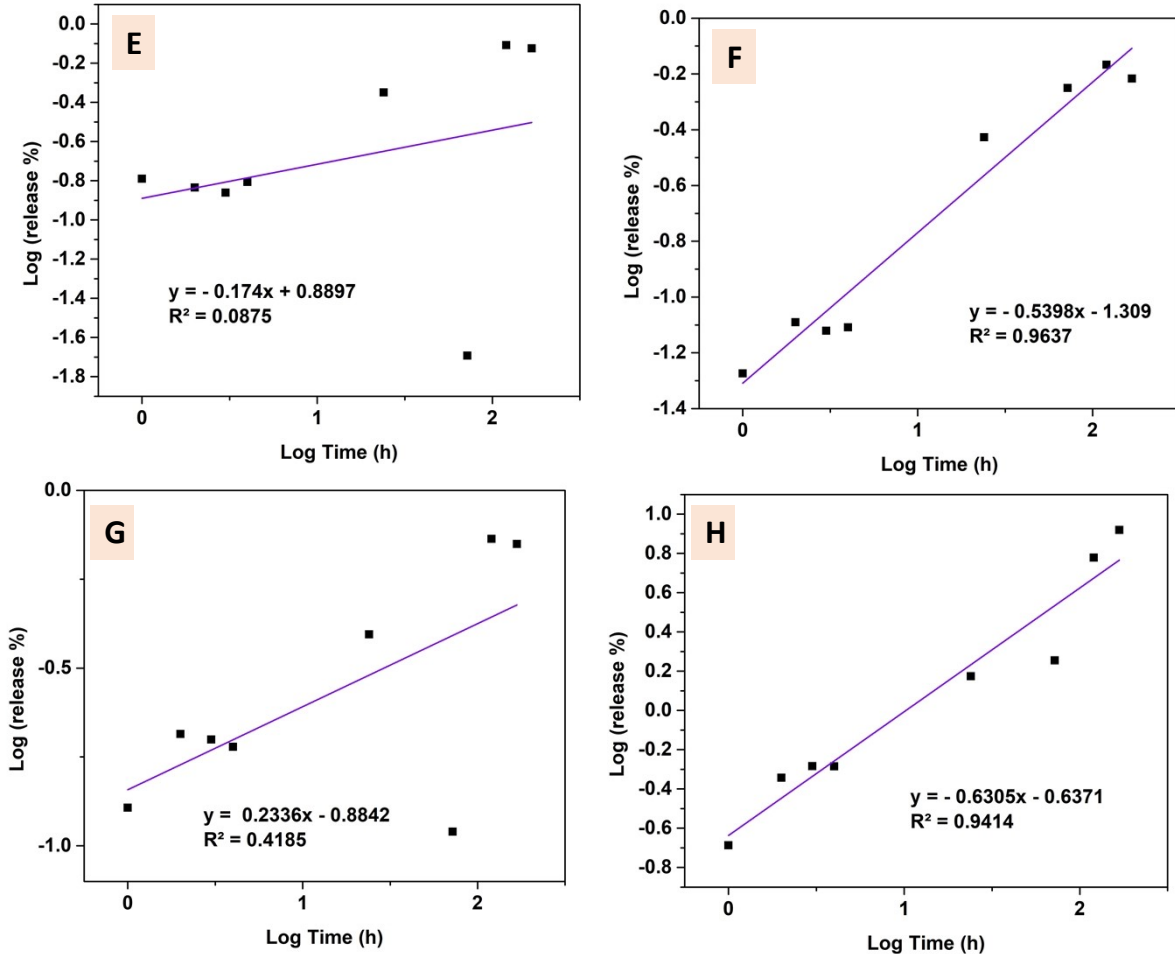

**Figure S\_3.** Higuchi release (A, B, C, D) and Korsmeyer-Peppas (E, F, G, H) model of LVF-loaded sample.

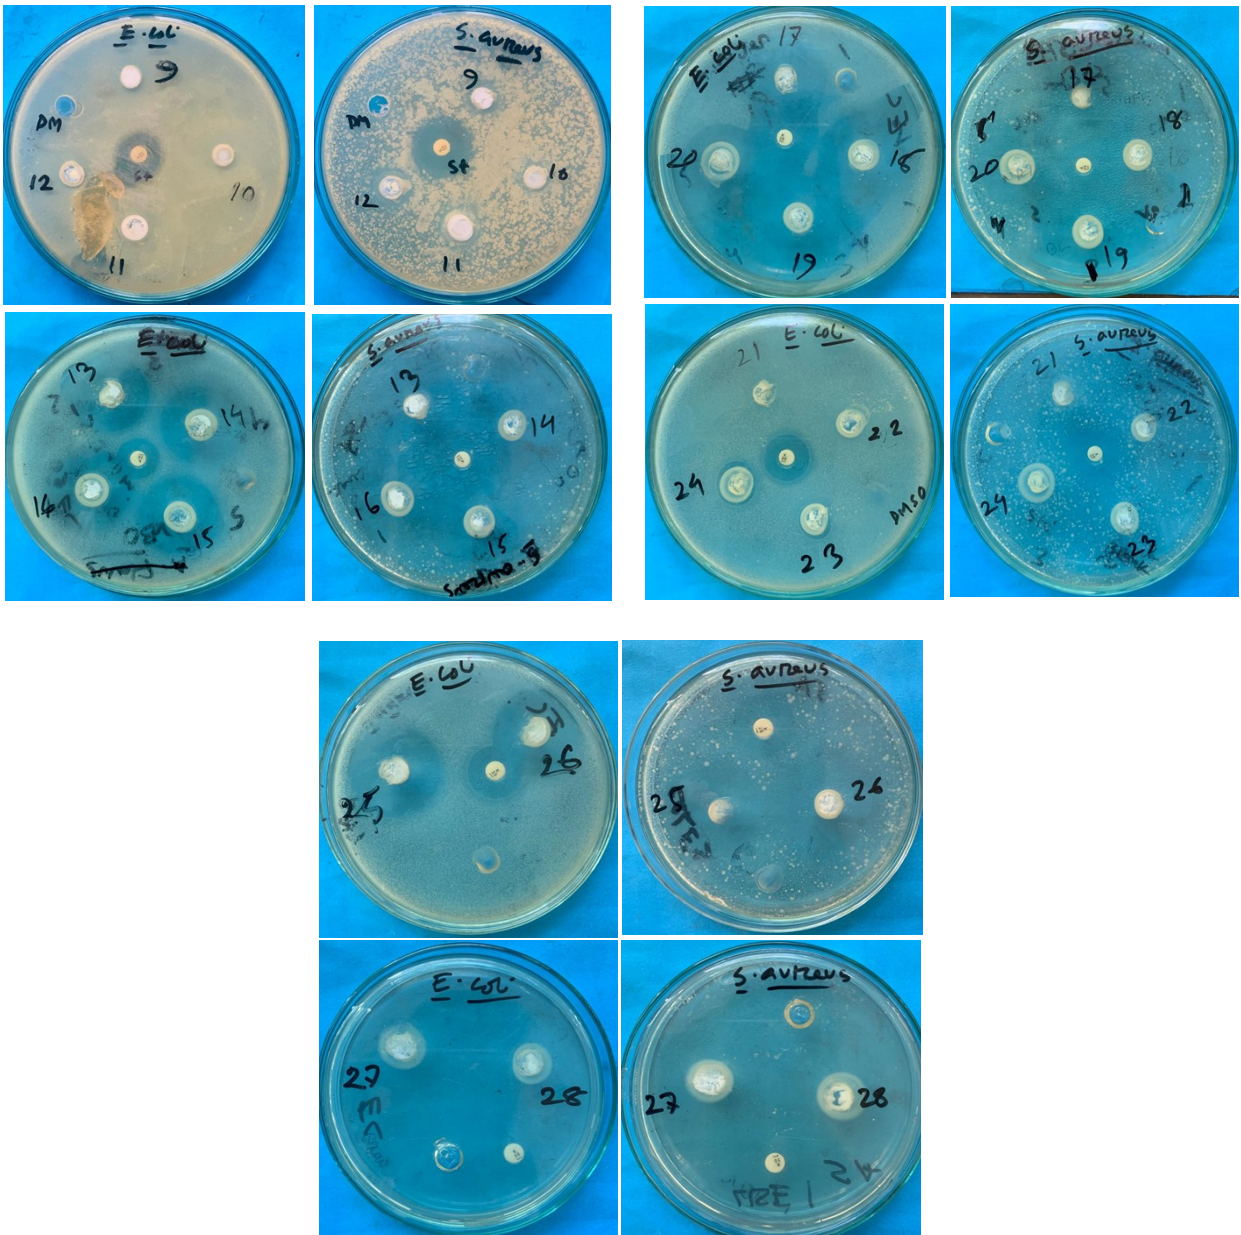

**Figure S\_4.** Antimicrobial activity of 2:1\_CS, 2:1.5\_CS, 2:2\_CS, and 2:3\_CS samples before and after drug loading and releasing.

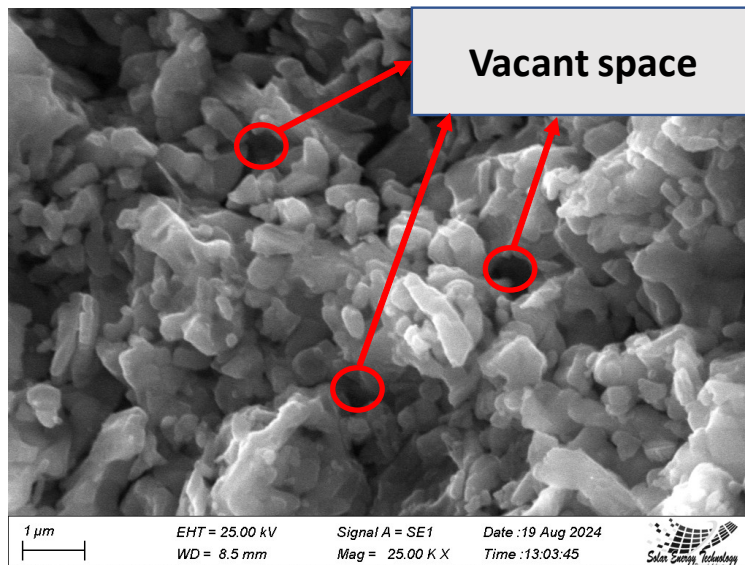

Figure S\_5. FESEM of 2:1\_CS sample after CIP loading.

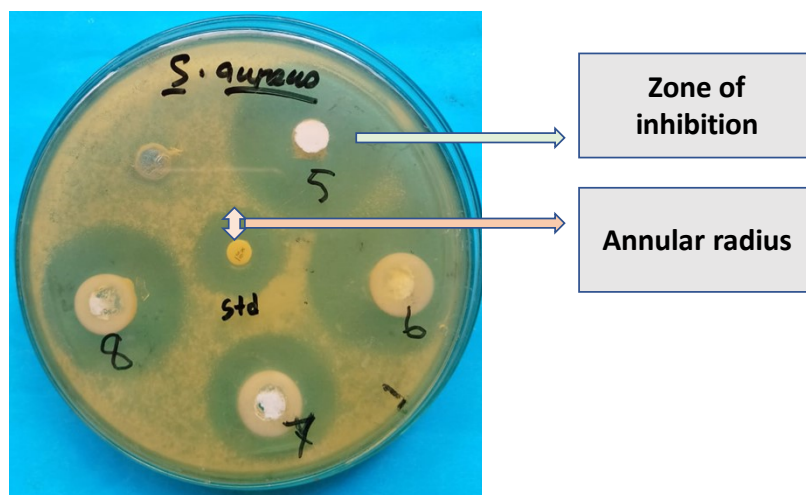

Figure S\_6. Indication of the zone of inhibition.

**Table S\_3:** CIP-loaded sample.

| <b>Time (day)</b> | <b>Sample name</b> | <b>pH</b> | <b>Temperature (°C)</b> | <b>Conductivity (µS)</b> | <b>Salinity (g/L)</b> | <b>Resistance (mΩ)</b> | <b>TDS (mg/L)</b> |
|-------------------|--------------------|-----------|-------------------------|--------------------------|-----------------------|------------------------|-------------------|
| 1                 | 2:1_CS             | 6.34      | 26.2                    | 129                      | 0.4                   | -1                     | 71.4              |
|                   | 2:1.5_CS           | 6.72      | 26.4                    | 145                      | 0.5                   | -1                     | 81.2              |
|                   | 2:2_CS             | 6.53      | 26                      | 121                      | 0.5                   | -1                     | 69.5              |
|                   | 2:3_CS             | 6.45      | 26.7                    | 134                      | 0.5                   | -1                     | 84.2              |
| 3                 | 2:1_CS             | 10.56     | 28.9                    | 336                      | 0.4                   | -1                     | 201               |
|                   | 2:1.5_CS           | 11.61     | 29                      | 505                      | 0.5                   | -1                     | 302               |
|                   | 2:2_CS             | 10.91     | 29.2                    | 393                      | 0.5                   | -1                     | 235               |
|                   | 2:3_CS             | 12.85     | 30                      | 7020                     | 0.5                   | -1                     | 4210              |
| 5                 | 2:1_CS             | 10.17     | 27.1                    | 380                      | 0.4                   | -1                     | 227               |
|                   | 2:1.5_CS           | 10.35     | 27.5                    | 408                      | 0.5                   | -1                     | 249               |
|                   | 2:2_CS             | 10.34     | 27.9                    | 439                      | 0.4                   | -1                     | 263               |
|                   | 2:3_CS             | 12.11     | 27.4                    | 4650                     | 2                     | -1                     | 2770              |
| 7                 | 2:1_CS             | 9.63      | 27.5                    | 359                      | 0.4                   | -1                     | 214               |
|                   | 2:1.5_CS           | 10.31     | 29.1                    | 410                      | 0.5                   | -1                     | 245               |
|                   | 2:2_CS             | 10.59     | 28.8                    | 462                      | 0.5                   | -1                     | 276               |
|                   | 2:3_CS             | 12.45     | 28.3                    | 6040                     | 2.6                   | -1                     | 3610              |
| 14                | 2:1_CS             | 9.76      | 26.7                    | 304                      | 0.4                   | -1                     | 189.8             |
|                   | 2:1.5_CS           | 10.08     | 26.9                    | 402                      | 0.4                   | -1                     | 239               |
|                   | 2:2_CS             | 10.11     | 27.1                    | 429                      | 0.5                   | -1                     | 256               |
|                   | 2:3_CS             | 12.15     | 27.5                    | 6330                     | 2.7                   | -1                     | 3780              |
| 21                | 2:1_CS             | 9.84      | 27.6                    | 353                      | 0.4                   | -1                     | 210               |
|                   | 2:1.5_CS           | 9.68      | 28.1                    | 366                      | 0.4                   | -1                     | 218               |
|                   | 2:2_CS             | 9.72      | 27.9                    | 358                      | 0.4                   | -1                     | 213               |
|                   | 2:3_CS             | 12.41     | 29.1                    | 5460                     | 2.4                   | -1                     | 3320              |

**Table S\_4:** AMX loaded sample.

| <b>Time (day)</b> | <b>Sample name</b> | <b>pH</b> | <b>Temperature (°C)</b> | <b>Conductivity (µS)</b> | <b>Salinity (g/L)</b> | <b>Resistance (MΩ)</b> | <b>TDS (mg/L)</b> |
|-------------------|--------------------|-----------|-------------------------|--------------------------|-----------------------|------------------------|-------------------|
| 1                 | 2:1_CS             | 6.23      | 26.3                    | 13.63                    | 0.3                   | 0.07                   | 6.28              |
|                   | 2:1.5_CS           | 6.21      | 26.8                    | 13.02                    | 0.4                   | 0.06                   | 6.49              |
|                   | 2:2_CS             | 6.21      | 27.2                    | 14.69                    | 0.4                   | 0.07                   | 7.01              |
|                   | 2:3_CS             | 6.56      | 27                      | 18.17                    | 0.5                   | 0.07                   | 6.92              |
| 3                 | 2:1_CS             | 10.87     | 27.1                    | 330                      | 0.4                   | -1                     | 200               |
|                   | 2:1.5_CS           | 10.82     | 27.6                    | 333                      | 0.4                   | -1                     | 200               |
|                   | 2:2_CS             | 10.71     | 28.4                    | 353                      | 0.4                   | -1                     | 211               |
|                   | 2:3_CS             | 12.62     | 27.9                    | 3590                     | 1.6                   | -1                     | 2160              |
| 5                 | 2:1_CS             | 10.66     | 27.1                    | 360                      | 0.4                   | -1                     | 215               |
|                   | 2:1.5_CS           | 10.63     | 26.9                    | 425                      | 0.5                   | -1                     | 254               |
|                   | 2:2_CS             | 10.21     | 27.2                    | 394                      | 0.4                   | -1                     | 238               |
|                   | 2:3_CS             | 10.06     | 27.2                    | 174.8                    | 0.5                   | -1                     | 105.7             |
| 7                 | 2:1_CS             | 10.52     | 27.9                    | 324                      | 0.4                   | -1                     | 192.6             |
|                   | 2:1.5_CS           | 10.43     | 27.5                    | 368                      | 0.4                   | -1                     | 219               |
|                   | 2:2_CS             | 10.23     | 27.6                    | 394                      | 0.5                   | -1                     | 236               |
|                   | 2:3_CS             | 10        | 27.7                    | 175.8                    | 0.4                   | -1                     | 105.4             |
| 14                | 2:1_CS             | 10.90     | 27.1                    | 426                      | 0.5                   | -1                     | 257               |
|                   | 2:1.5_CS           | 9.75      | 27.2                    | 273                      | 0.4                   | -1                     | 165.4             |
|                   | 2:2_CS             | 9.84      | 27.7                    | 337                      | 0.4                   | -1                     | 202               |
|                   | 2:3_CS             | 9.59      | 27.3                    | 249                      | 0.4                   | -1                     | 148.2             |
| 21                | 2:1_CS             | 10.90     | 27                      | 438                      | 0.5                   | -1                     | 265               |
|                   | 2:1.5_CS           | 9.85      | 27.6                    | 311                      | 0.4                   | -1                     | 183.4             |
|                   | 2:2_CS             | 9.68      | 27.5                    | 314                      | 0.4                   | -1                     | 189.1             |
|                   | 2:3_CS             | 9.40      | 26.7                    | 289                      | 0.4                   | -1                     | 173.4             |

**Table S\_5:** LVF-loaded sample.

| <b>Time (day)</b> | <b>Sample name</b> | <b>pH</b> | <b>Temperature (°C)</b> | <b>Conductivity (μS)</b> | <b>Salinity (g/L)</b> | <b>Resistance (MΩ)</b> | <b>TDS (mg/L)</b> |
|-------------------|--------------------|-----------|-------------------------|--------------------------|-----------------------|------------------------|-------------------|
| 1                 | 2:1_CS             | 6.84      | 26.7                    | 53                       | 0.3                   | 0.02                   | 31.6              |
|                   | 2:1.5_CS           | 6.94      | 26.9                    | 47.1                     | 0.3                   | 0.02                   | 29.3              |
|                   | 2:2_CS             | 6.93      | 26.3                    | 49                       | 0.3                   | 0.02                   | 36.6              |
|                   | 2:3_CS             | 6.59      | 27.6                    | 51.2                     | 0.3                   | 0.02                   | 47.6              |
| 3                 | 2:1_CS             | 9.80      | 27.9                    | 323                      | 0.4                   | -1                     | 193               |
|                   | 2:1.5_CS           | 10.38     | 27.7                    | 303                      | 0.4                   | -1                     | 181.3             |
|                   | 2:2_CS             | 10.39     | 28.2                    | 370                      | 0.4                   | -1                     | 222               |
|                   | 2:3_CS             | 12.92     | 28.3                    | 690                      | 3                     | -1                     | 4140              |
| 5                 | 2:1_CS             | 9.25      | 26.8                    | 328                      | 0.4                   | -1                     | 198.6             |
|                   | 2:1.5_CS           | 9.51      | 27.2                    | 299                      | 0.5                   | -1                     | 179.4             |
|                   | 2:2_CS             | 9.77      | 26.5                    | 389                      | 0.4                   | -1                     | 233               |
|                   | 2:3_CS             | 12.30     | 26.3                    | 5940                     | 2.6                   | -1                     | 3560              |
| 7                 | 2:1_CS             | 9.24      | 27                      | 222                      | 0.4                   | -1                     | 136.6             |
|                   | 2:1.5_CS           | 9.46      | 27.9                    | 311                      | 0.4                   | -1                     | 186.1             |
|                   | 2:2_CS             | 9.68      | 28.4                    | 383                      | 0.4                   | -1                     | 230               |
|                   | 2:3_CS             | 12.28     | 28.3                    | 5390                     | 2.3                   | -1                     | 3220              |
| 14                | 2:1_CS             | 9.15      | 26.6                    | 347                      | 0.5                   | -1                     | 206               |
|                   | 2:1.5_CS           | 9.37      | 27.2                    | 303                      | 0.4                   | -1                     | 181.2             |
|                   | 2:2_CS             | 9.45      | 27.3                    | 340                      | 0.4                   | -1                     | 203               |
|                   | 2:3_CS             | 12.26     | 27.9                    | 349                      | 1.6                   | -1                     | 2050              |
| 21                | 2:1_CS             | 9.21      | 27.3                    | 204                      | 0.4                   | -1                     | 122.6             |
|                   | 2:1.5_CS           | 9.36      | 27.3                    | 258                      | 0.4                   | -1                     | 156.2             |
|                   | 2:2_CS             | 9.43      | 28.5                    | 201                      | 0.4                   | -1                     | 115.7             |
|                   | 2:3_CS             | 11.89     | 27.9                    | 1801                     | 0.9                   | -1                     | 1073              |

**Table S\_6:** Drug release of CIP-loaded sample.

| <b>Time (day)</b> | <b>Sample name</b> | <b>pH</b> | <b>Temperature (°C)</b> | <b>Conductivity (mS)</b> | <b>Salinity (g/L)</b> | <b>Resistance (MΩ)</b> | <b>TDS (g/L)</b> |
|-------------------|--------------------|-----------|-------------------------|--------------------------|-----------------------|------------------------|------------------|
| Initial           | SBF                | 7.4       | 26.8                    | 20.4                     | 10.1                  | -1                     | 12.29            |
| 1                 | 2:1_CS             | 8.65      | 29.5                    | 25.2                     | 13.4                  | -1                     | 14.91            |
|                   | 2:1.5_CS           | 8.93      | 29.1                    | 24.2                     | 12.72                 | -1                     | 14.15            |
|                   | 2:2_CS             | 9.11      | 30.2                    | 9.42                     | 13.1                  | -1                     | 12.86            |
|                   | 2:3_CS             | 9.12      | 29.5                    | 23.3                     | 11.9                  | -1                     | 14.11            |
| 3                 | 2:1_CS             | 9.10      | 31.6                    | 18.1                     | 8.8                   | -1                     | 10.89            |
|                   | 2:1.5_CS           | 9.46      | 31.3                    | 23.4                     | 12.1                  | -1                     | 14.23            |
|                   | 2:2_CS             | 9.80      | 31.3                    | 24.7                     | 12.9                  | -1                     | 14.77            |
|                   | 2:3_CS             | 9.95      | 31.3                    | 22.9                     | 11.8                  | -1                     | 13.76            |
| 5                 | 2:1_CS             | 9.06      | 30.4                    | 24.7                     | 13.1                  | -1                     | 14.65            |
|                   | 2:1.5_CS           | 9.41      | 30.9                    | 22.4                     | 11.4                  | -1                     | 13.38            |
|                   | 2:2_CS             | 9.60      | 30.2                    | 24.7                     | 13.0                  | -1                     | 14.76            |
|                   | 2:3_CS             | 9.76      | 30.3                    | 23.3                     | 12.0                  | -1                     | 13.97            |
| 7                 | 2:1_CS             | 9.13      | 28.6                    | 25.0                     | 12.7                  | -1                     | 14.71            |
|                   | 2:1.5_CS           | 9.42      | 29.5                    | 23.5                     | 12.2                  | -1                     | 14.05            |
|                   | 2:2_CS             | 9.62      | 29.2                    | 24.3                     | 12.8                  | -1                     | 14.55            |
|                   | 2:3_CS             | 9.77      | 29.7                    | 29.9                     | 11.8                  | -1                     | 13.78            |

**Table S\_7:** Drug release of AMX-loaded sample.

| <b>Time (day)</b> | <b>Sample name</b> | <b>pH</b> | <b>Temperature (°C)</b> | <b>Conductivity (mS)</b> | <b>Salinity (g/L)</b> | <b>Resistance (MΩ)</b> | <b>TDS (g/L)</b> |
|-------------------|--------------------|-----------|-------------------------|--------------------------|-----------------------|------------------------|------------------|
| Initial           | SBF                | 7.4       | 26.8                    | 20.4                     | 10.1                  | -1                     | 12.29            |
| 1                 | 2:1_CS             | 8.97      | 29.0                    | 24.5                     | 13.0                  | -1                     | 14.64            |
|                   | 2:1.5_CS           | 9.13      | 28.3                    | 24                       | 12.6                  | -1                     | 14.60            |
|                   | 2:2_CS             | 9.21      | 27.8                    | 24.3                     | 12.4                  | -1                     | 14.35            |
|                   | 2:3_CS             | 9.35      | 29.3                    | 22.4                     | 11.5                  | -1                     | 13.44            |
| 3                 | 2:1_CS             | 9.32      | 30.2                    | 25.8                     | 13.8                  | -1                     | 15.65            |
|                   | 2:1.5_CS           | 9.68      | 31.3                    | 23.9                     | 12.5                  | -1                     | 14.38            |
|                   | 2:2_CS             | 9.67      | 30.9                    | 25.0                     | 13.1                  | -1                     | 14.98            |
|                   | 2:3_CS             | 10.14     | 30.9                    | 24.4                     | 12.8                  | -1                     | 14.62            |
| 5                 | 2:1_CS             | 9.31      | 28.6                    | 26.1                     | 14                    | -1                     | 15.60            |
|                   | 2:1.5_CS           | 9.58      | 29.5                    | 24.1                     | 12.6                  | -1                     | 14.52            |
|                   | 2:2_CS             | 9.55      | 29.8                    | 25.3                     | 13.4                  | -1                     | 15.21            |
|                   | 2:3_CS             | 9.85      | 30.6                    | 23.9                     | 12.5                  | -1                     | 14.36            |
| 7                 | 2:1_CS             | 9.33      | 28.8                    | 26                       | 14.6                  | -1                     | 16.07            |
|                   | 2:1.5_CS           | 9.68      | 27.9                    | 23.4                     | 12.1                  | -1                     | 14.07            |
|                   | 2:2_CS             | 9.67      | 28.7                    | 25.4                     | 13.5                  | -1                     | 15.30            |
|                   | 2:3_CS             | 10.11     | 29.3                    | 24.0                     | 12.5                  | -1                     | 14.39            |

**Table S\_8:** Drug release of LVF-loaded sample.

| <b>Time (day)</b> | <b>Sample name</b> | <b>pH</b> | <b>Temperature (°C)</b> | <b>Conductivity (mS)</b> | <b>Salinity (g/L)</b> | <b>Resistance (MΩ)</b> | <b>TDS (g/L)</b> |
|-------------------|--------------------|-----------|-------------------------|--------------------------|-----------------------|------------------------|------------------|
| Initial           | SBF                | 7.4       | 26.8                    | 20.4                     | 10.1                  | -1                     | 12.29            |
| 1                 | 2:1_CS             | 9.08      | 27.8                    | 23.3                     | 12.1                  | -1                     | 14.08            |
|                   | 2:1.5_CS           | 9.20      | 29.2                    | 23.2                     | 12.0                  | -1                     | 13.92            |
|                   | 2:2_CS             | 9.33      | 29.3                    | 23.1                     | 11.9                  | -1                     | 13.84            |
|                   | 2:3_CS             | 9.44      | 29.4                    | 22.5                     | 11.5                  | -1                     | 13.51            |
| 3                 | 2:1_CS             | 9.35      | 29.1                    | 25.1                     | 13.4                  | -1                     | 15.15            |
|                   | 2:1.5_CS           | 9.70      | 29.8                    | 26.1                     | 13.9                  | -1                     | 15.63            |
|                   | 2:2_CS             | 9.75      | 28.9                    | 25.7                     | 13.7                  | -1                     | 15.35            |
|                   | 2:3_CS             | 9.91      | 29.4                    | 24.8                     | 13.2                  | -1                     | 14.99            |
| 5                 | 2:1_CS             | 9.34      | 29.0                    | 25.6                     | 13.6                  | -1                     | 15.48            |
|                   | 2:1.5_CS           | 9.61      | 29.8                    | 25.3                     | 13.4                  | -1                     | 15.17            |
|                   | 2:2_CS             | 9.63      | 29.9                    | 23.7                     | 12.3                  | -1                     | 14.09            |
|                   | 2:3_CS             | 9.71      | 30.0                    | 23.5                     | 12.1                  | -1                     | 14.08            |
| 7                 | 2:1_CS             | 9.47      | 27.7                    | 25.1                     | 13.3                  | -1                     | 15.16            |
|                   | 2:1.5_CS           | 9.62      | 29                      | 25.9                     | 13.8                  | -1                     | 15.52            |
|                   | 2:2_CS             | 9.67      | 29.5                    | 25                       | 13.2                  | -1                     | 14.97            |
|                   | 2:3_CS             | 9.76      | 29.7                    | 23.9                     | 12.5                  | -1                     | 14.30            |
